# Supplementary material
Source: publisher site journal article supplement (https://www.dovepress.com/article/484472)
Supplement: Supplementary file 1 [file get_supplementary_file.php]

**Supplementary file 1: Detailed methods**

**Study setting**

The data was collected from five hospitals in Saudi Arabia: King Abdulaziz Medical City (Riyadh & Jeddah), King Abdulaziz University Hospital (Jeddah), King Abdullah bin Abdulaziz University Hospital (KAAUH) (Riyadh), and King Salman Specialist Hospital (Hail). These centers were selected based on the geographic distribution, the availability of electronic records, and the center's willingness to participate in the national project. The primary site was King Abdulaziz Medical City (Riyadh).

**Data collection**

Participants' data were collected and controlled using King Abdullah International Medical Research Center's Research Electronic Data Capture (REDCap®) software. We collected patients' demographic data, comorbidities, vital signs and laboratory tests, baseline severity scores (i.e., Acute Physiology and Chronic Health Evaluation II (APACHE II), and Sequential Organ Failure Assessment (SOFA)), MV parameters (e.g., PaO2/FiO2 ratio) and oxygenation index (OI) within 24 hours of ICU admission. Moreover, coagulation and hematological tests (i.e., Hematocrit, platelets, INR, aPTT, fibrinogen, D-dimer), inflammatory markers (i.e., Ferritin, and C-reactive protein), renal (i.e., Serum creatinine, Blood urea nitrogen (BUN)), and liver function tests (e.g., Alanine transaminase (ALT) and total bilirubin) within 24 hours of ICU admission were collected. In addition, ventilator-free days (VFDs), length of stay, and blood product transfusion were recorded for the eligible patients.
